# Supplementary material for: Molecular Detection and Typing of Pathogenic Leptospira in Febrile Patients and Phylogenetic Comparison with Leptospira Detected among Animals in Tanzania
Source: PubMed Central journal article supplement (PMC7543812; doi:10.4269/ajtmh.19-0703), 2020-08-03
Supplement: tpmd190703.SD1.pdf [file tpmd190703.SD1.pdf]

**Supplemental Table: Number of patients and samples (types) available for *lipL32* quantitative PCR testing for pathogenic *Leptospira* infection among patients hospitalized with fever, Tanzania, 2007-08 and 2012-14**

| <b>Patient group</b>          | <b>Number of patients</b> | <b>Number of serum samples<br/>(Positive/total tested)</b> | <b>Number of plasma samples<br/>(Positive/total tested)</b> | <b>Number of urine samples<br/>(Positive/total tested)</b> |
|-------------------------------|---------------------------|------------------------------------------------------------|-------------------------------------------------------------|------------------------------------------------------------|
| <b>Study 1:<br/>Cases</b>     | 43                        | -                                                          | 0/40                                                        | 0/25                                                       |
| <b>Study 1:<br/>Decedents</b> | 18                        | -                                                          | 0/18                                                        | 0/5                                                        |
| <b>Study 2:<br/>Cases</b>     | 24                        | 3/24                                                       | -                                                           | -                                                          |
| <b>Study 2<br/>Decedents</b>  | 26                        | 1/26                                                       | -                                                           | -                                                          |
| <b>Total</b>                  | <b>111</b>                | <b>4/50</b>                                                | <b>0/58</b>                                                 | <b>0/30</b>                                                |
